# Supplementary material for: The preparation of Al2O3/g-C3N4 composites in aluminum–water self-assembly system and its improved photocatalytic properties
Source: Royal Society of Chemistry journal article supplement (doi:10.1039/d1nj02420e), 2021-01-01
Supplement: d1nj02420e1.pdf [file d1nj02420e1.pdf]

## Supplementary Information

### The preparation of Al<sub>2</sub>O<sub>3</sub>/g-C<sub>3</sub>N<sub>4</sub> composites in aluminum-water self-assembly system and its improved photocatalytic properties

Yining Zheng, Cundi Wei, Qi An, Jinsheng Yu, Shaonan Xu\* and Lina Li \*

Key Laboratory of Automobile Materials of Ministry of Education, Solid Waste Recycling Engineering Research Center of Jilin, School of Materials Science and Engineering, State Key laboratory of Inorganic Synthesis & Preparative Chemistry, Jilin University, Changchun, 130022, Jilin Prov., China;

#### *S1. Preparation of photocatalyst*

Certain amount of Al-Ga-In ternary aluminum alloys (0.01 g, 0.05 g, 0.1 g, 0.2 g, 0.3 g or other 0.4 g) was added into 150 mL beakers with deionized water to 90 °C, together with 1.5 g melamine and 1.5 g cyanuric acid. ( each for M and CA) to each beaker. Then, the reaction system kept stirring for 3 hours at 90 °C until the reaction is complete. The mixture was cooled to room temperature, and then filtered, dried, and ground. The drying temperature was 80 °C. The obtained powder samples were heated to 600 °C at a heating rate of 5 °C/min in an argon atmosphere of a tube furnace, kept for 4.5 h, cooled to room temperature, and then taken out to obtain a composite photocatalytic material Al<sub>2</sub>O<sub>3</sub>/g-C<sub>3</sub>N<sub>4</sub>. According to the quality of the Al-Ga-In ternary alloy added during the synthesis process, the composite photocatalytic materials were named AlOOH/CM-1 ~ AlOOH/CM-6 before calcination, and the samples after calcination were named Al<sub>2</sub>O<sub>3</sub>/g-C<sub>3</sub>N<sub>4</sub>-1 ~ Al<sub>2</sub>O<sub>3</sub>/g-C<sub>3</sub>N<sub>4</sub>-6.

#### *S2. Degradation reaction of RhB*

In a typical photocatalytic experiment, 5 mg photocatalyst are accurately weighted and added in to a 10 mL of 10 mgL<sup>-1</sup> RhB solution in a sealed glass bottle. A 50 W LED lamp with white light irradiation (380-840 nm) was used at a distance of 20 cm. Before the light irradiation, the suspensions were magnetically stirred for 30 min to reach the adsorption-desorption equilibrium. After the light irradiation, 3 mL solution was taken and centrifugated for UV-vis absorption spectra measurement. During the experiments, all the steps are similar, only with the changes of catalysts.

#### *S3. Characterization*

PXRD patterns were recorded with a Rigacu Dmax 2500 instrument with Cu K $\alpha$  radiation at 35 kV and 40 mA. Fourier transform infrared spectroscopy (FTIR) was collected on a Bruker IFS 66 v/s spectrometer which was registered between 4000 and 500 cm<sup>-1</sup> with 128 scans per spectrum. Scanning electron microscope (XL-30 ESEM, FEI COMPANY<sup>TM</sup>) and electronic differential system (X-MAX, OXFORD INSTRUMENTS) were employed to reveal morphology of the synthesized samples. Ultraviolet photoelectron spectrometer (UPS,

ESCALAB 250 Xi) analyzed was carry out analysis with a excitation source of He I 21.22 eV radiation and UVS 10/35. And The calibration was performed by fermi level of silver reference sample. The specific surface area and N<sub>2</sub> adsorption-desorption isotherms were obtained with Micromeritics Tristar II 3020M and all samples were degassed at 150 °C for 4 h prior to measurements. UV–vis absorption spectra were recorded with a spectrophotometer (HITACHI, U-3900H). The steady-state PL spectrum was recorded using Edinburgh FLS980, and the excitation wavelength was 420 nm.

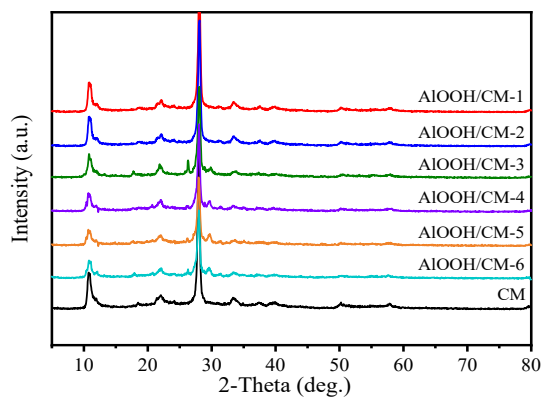

**Fig. S1** The XRD patterns of the composite photocatalytic materials before

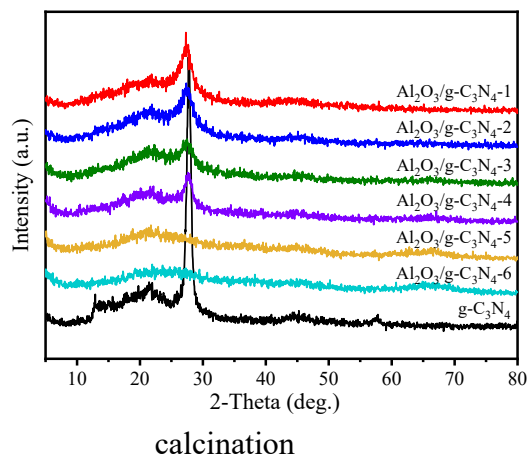

**Fig. S2** The XRD patterns of the composite photocatalytic material Al<sub>2</sub>O<sub>3</sub>/ g-C<sub>3</sub>N<sub>4</sub>

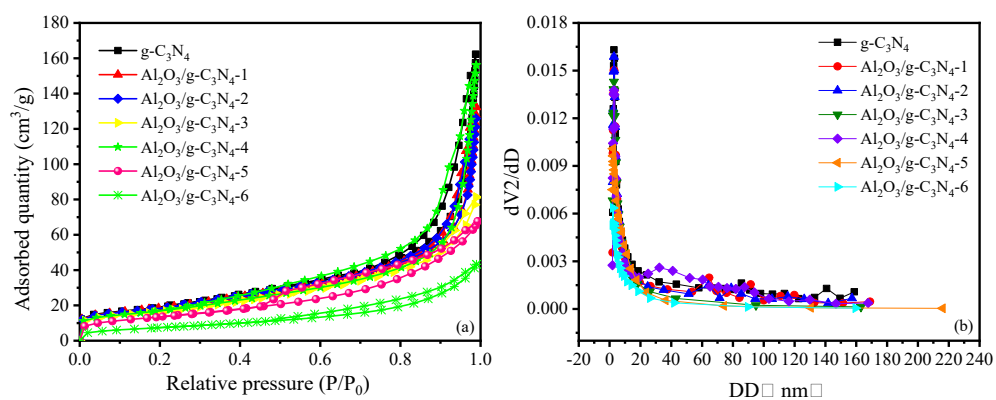

**Fig. S3** The composite photocatalytic materials Al<sub>2</sub>O<sub>3</sub>/g-C<sub>3</sub>N<sub>4</sub> : (a) N<sub>2</sub> adsorption-desorption isotherm, and (b) aperture distribution diagram

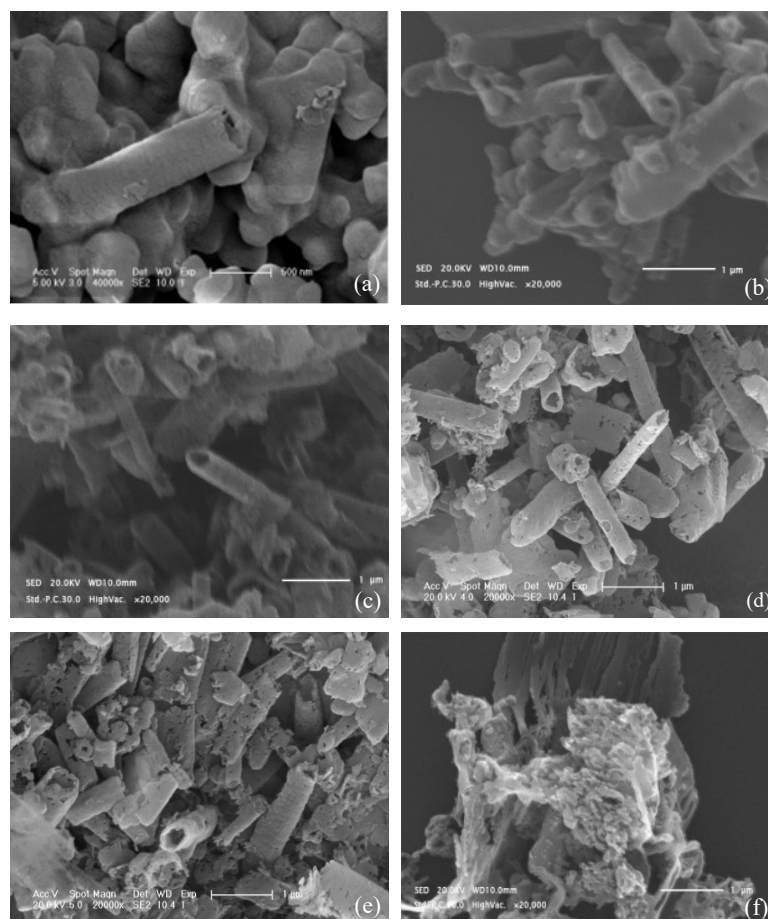

**Fig. S4-1** The SEM images of pure g-C<sub>3</sub>N<sub>4</sub> and the composite photocatalytic materials Al<sub>2</sub>O<sub>3</sub>/g-C<sub>3</sub>N<sub>4</sub>:(a)g-C<sub>3</sub>N<sub>4</sub>, (b)Al<sub>2</sub>O<sub>3</sub>/g-C<sub>3</sub>N<sub>4</sub>-1, and (c-f)Al<sub>2</sub>O<sub>3</sub>/g-C<sub>3</sub>N<sub>4</sub>-3 ~ Al<sub>2</sub>O<sub>3</sub>/g-C<sub>3</sub>N<sub>4</sub>-6

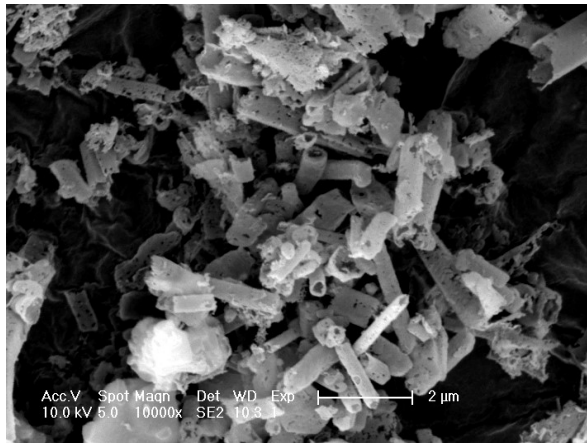

**Fig. S4-2** The SEM images Al<sub>2</sub>O<sub>3</sub>/g-C<sub>3</sub>N<sub>4</sub>-4

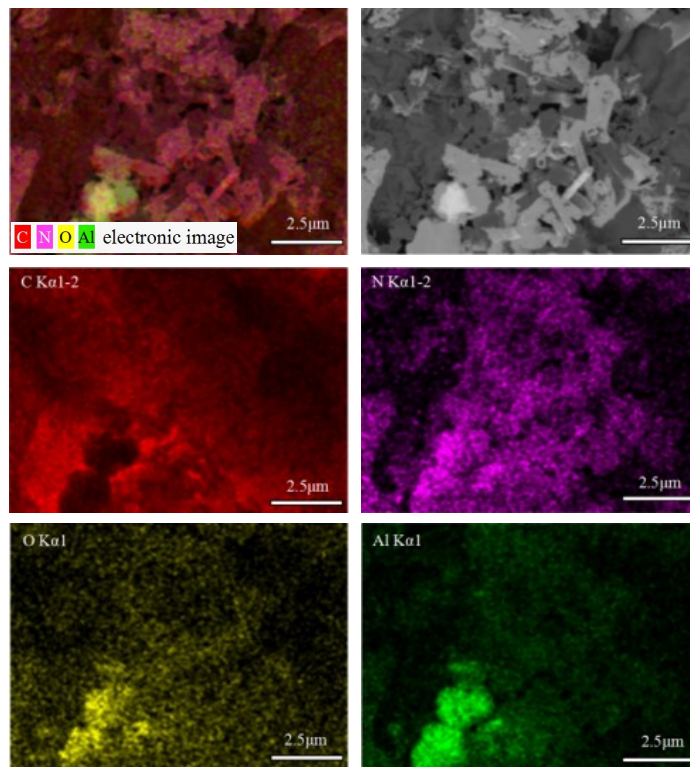

**Fig. S4-3** The EDX mapping of Al<sub>2</sub>O<sub>3</sub>/g-C<sub>3</sub>N<sub>4</sub>-4

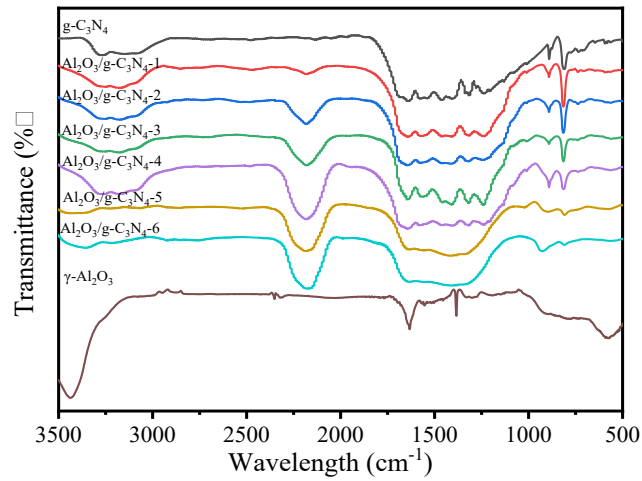

**Fig. S5** The FTIR images of the composite photocatalytic materials  $\text{Al}_2\text{O}_3/\text{g-C}_3\text{N}_4$

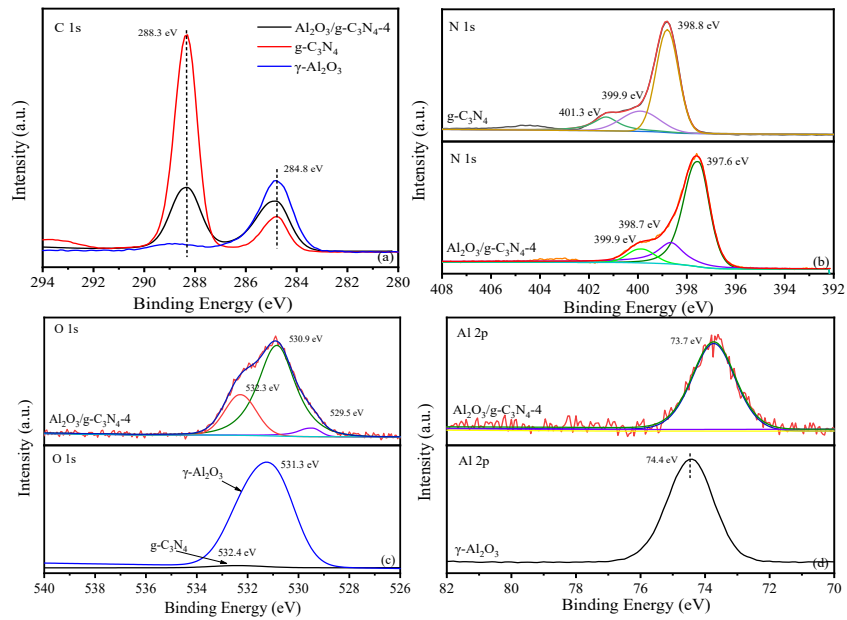

**Fig. S6** XPS high-resolution spectrogram of composite photocatalytic material  $\text{Al}_2\text{O}_3/\text{g-C}_3\text{N}_4\text{-4}$ : (a) C 1s, (b) N 1s, (c) O 1s, and (d) Al 2p

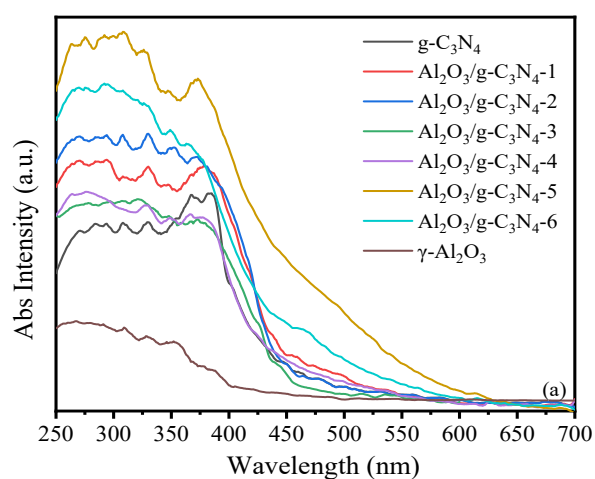

**Fig. S7** UV-vis absorption spectra of single g-C<sub>3</sub>N<sub>4</sub>, and Al<sub>2</sub>O<sub>3</sub>/g-C<sub>3</sub>N<sub>4</sub>

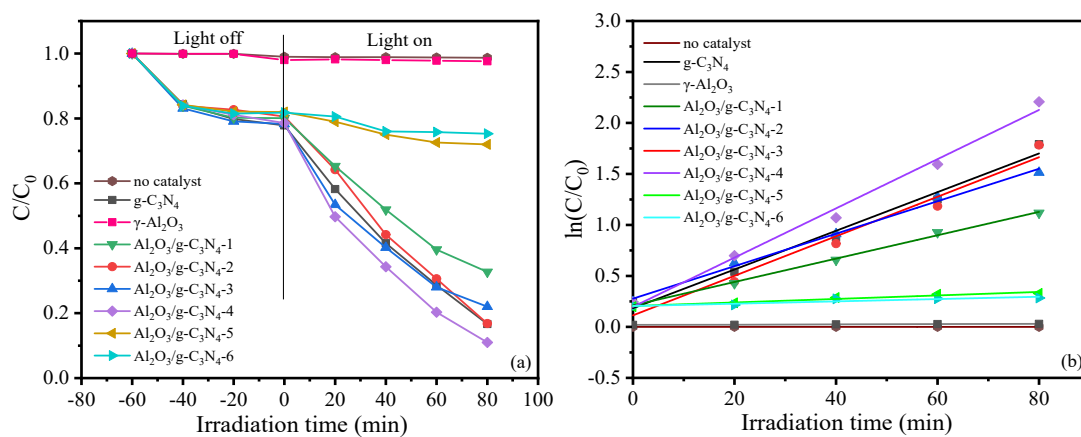

**Fig. S8** (a) The photodegradation RhB photocatalytic activity of Al<sub>2</sub>O<sub>3</sub>/g-C<sub>3</sub>N<sub>4</sub> under visible light irradiation, and (b) the first-order curve of photodegraded RhB of the samples

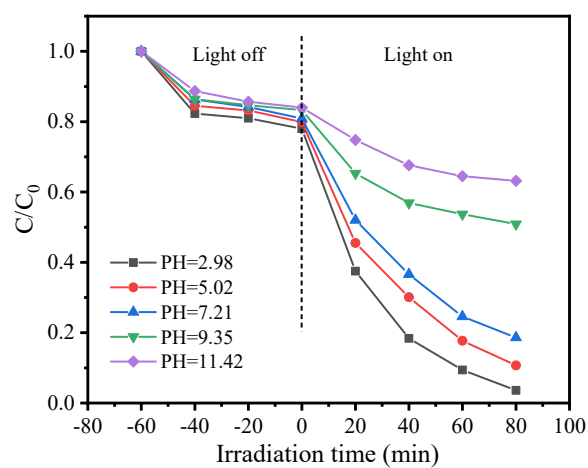

**Fig. S9** Degradation rate profile of RhB catalysed by  $\text{Al}_2\text{O}_3/\text{g-C}_3\text{N}_4$  at variable pH

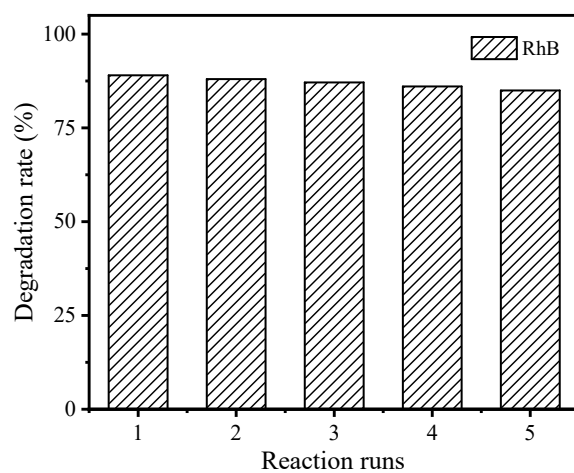

**Fig. S10** Photocatalytic degradation of RhB after up to five cycles measured after visible light irradiation of 80 min

**Table S1** Comparison of the advantages and disadvantages of the experimental method in this article and other methods

| Preparation strategy         | Whether to prepare at the same time | Dosage of chemicals (Represented by ★) | Performance improvement effect (Compared to a single g-C <sub>3</sub> N <sub>4</sub> ) | Article source                                                  |
|------------------------------|-------------------------------------|----------------------------------------|----------------------------------------------------------------------------------------|-----------------------------------------------------------------|
| One step-1                   | Yes                                 | ★                                      | 1.7 times                                                                              | This article                                                    |
| One step-2                   | Yes                                 | ★★★★                                   | 2.1 times                                                                              | <i>Catalysts</i> 2020, 10, 1036<br>(My other experimental work) |
| Two-step hydrothermal method | No                                  | ★★★★★                                  | 2.5 times                                                                              | <i>Ind. Eng. Chem. Res.</i> 2014, 53, 19540–19549               |



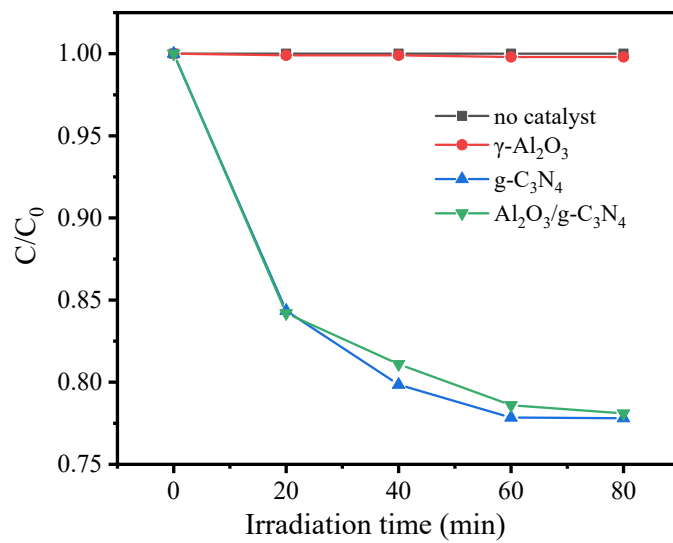

**Fig. S11**  $\text{Al}_2\text{O}_3/\text{g-C}_3\text{N}_4$  adsorption experiment for RhB
